# Supplementary material
Source: PubMed Central journal article supplement (PMC7065967)

Extended Data Fig 3A

Alpha-synuclein filament dot blot

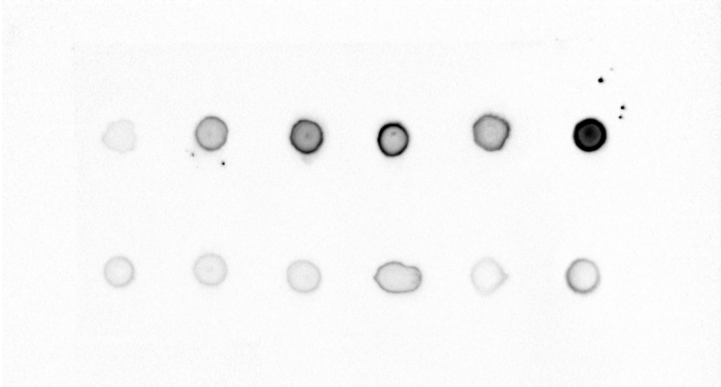

Extended Data Fig 3C

Alpha-synuclein filament dot blot

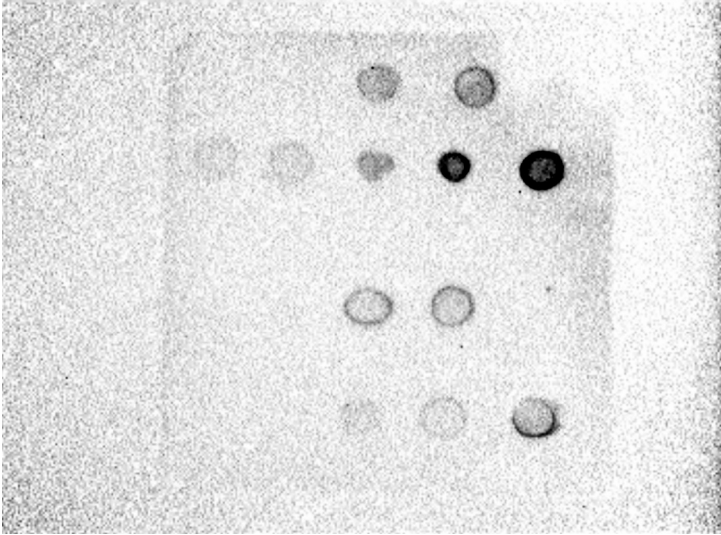

Supplement: NIHMS1548772-supplement-1548772_ED_Fig3_blots_source_data.pdf [file NIHMS1548772-supplement-1548772_ED_Fig3_blots_source_data.pdf]
