# Supplementary material
Source: PubMed Central journal article supplement (PMC7065967)

Fig 2C

S129P blot

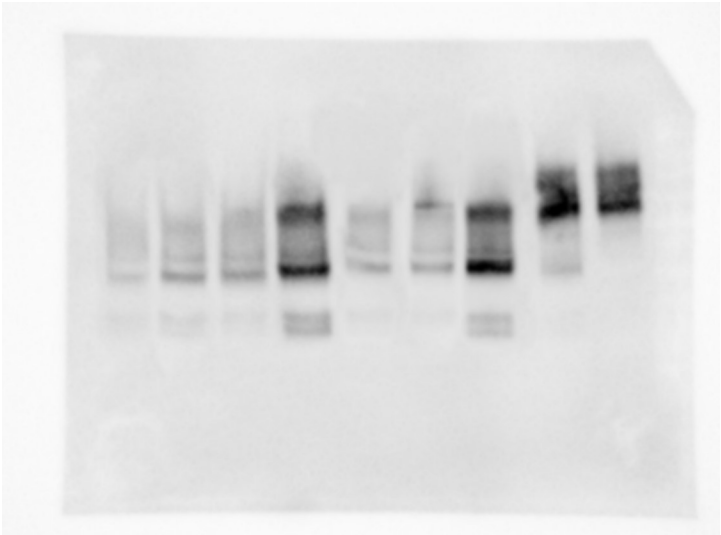

Fig 2C

GCase blot

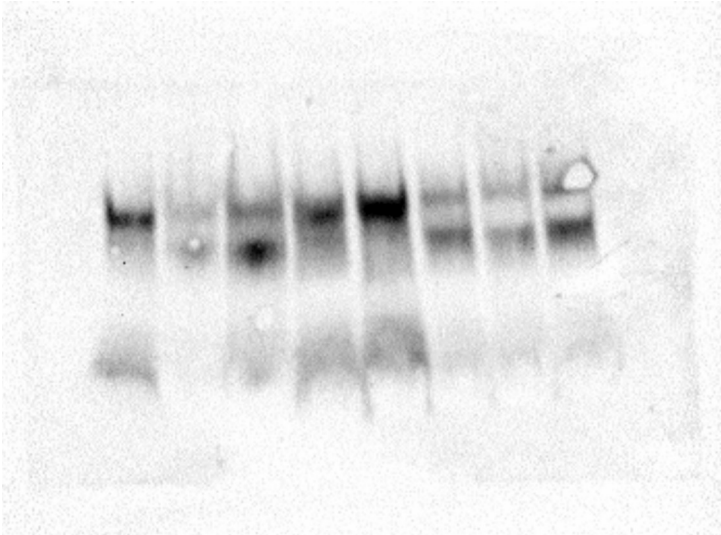

Fig 2C

Beta actin blot

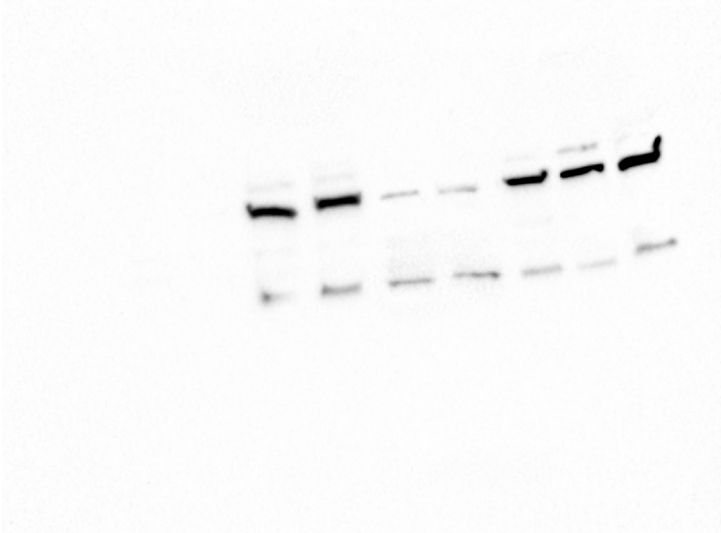

Fig 2H

GCCase blot

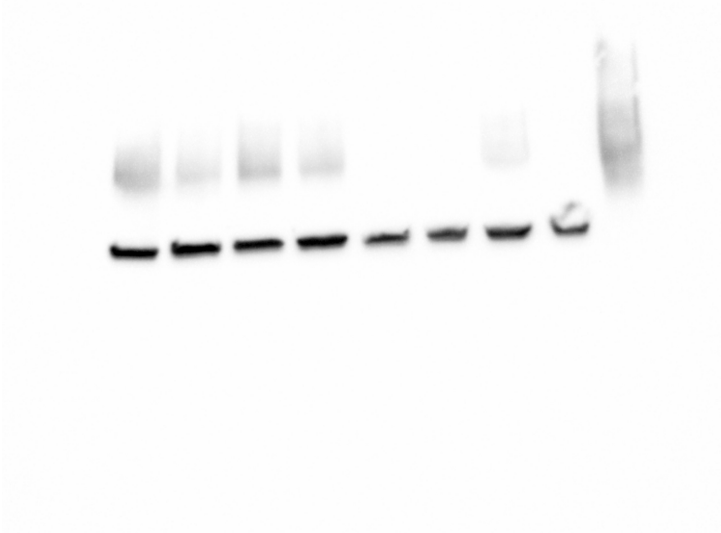

Fig 2H

S129P blot

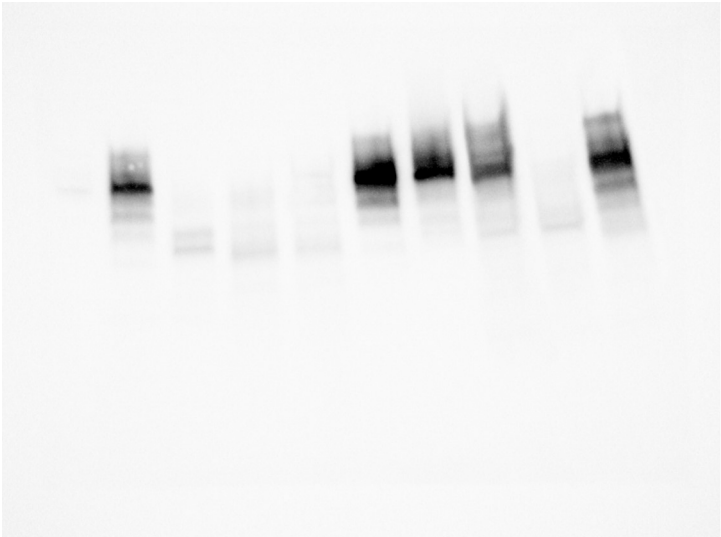

Fig 2H

Beta actin blot

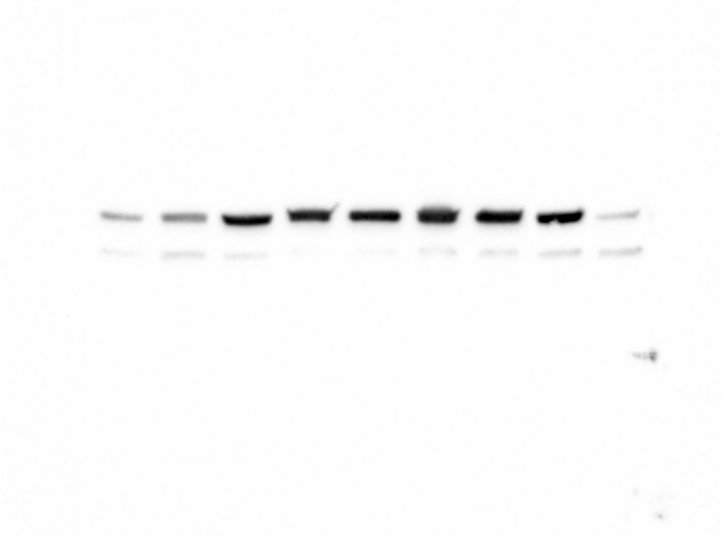

Supplement: NIHMS1548772-supplement-Fig2_blots_source_data.pdf [file NIHMS1548772-supplement-Fig2_blots_source_data.pdf]
