# Supplementary material
Source: PubMed Central journal article supplement (PMC7065967)
Supplement: NIHMS1548772-supplement-tables.pdf [file NIHMS1548772-supplement-tables.pdf]

**Supplementary Table 1. List of antibodies used**

| <b>Primary Antibodies</b>                                                                        | <b>Manufacturer</b>     | <b>Cat. #</b> | <b>Usage notes</b>                     |
|--------------------------------------------------------------------------------------------------|-------------------------|---------------|----------------------------------------|
| Mouse IgG2a monoclonal anti- $\alpha$ -synuclein phospho (Ser129) (Clone81A)                     | BioLegend               | MMS-5091      | Duodenum IHC 1:300<br>Brain IHC 1:500  |
| Rabbit polyclonal anti- $\alpha$ -synuclein phosphor (Ser129)                                    | Abcam                   | ab59264       | Western 1:500                          |
| Rabbit monoclonal anti-Alpha-synuclein filament antibody [MJFR-14-6-4-2] - Conformation-Specific | Abcam                   | ab209538      | Dot blot 2ng/mL                        |
| Rabbit polyclonal anti-Protein gene product 9.5 (PGP9.5)                                         | Millipore               | AB1761-I      | Duodenum IHC 1:300<br>Nodose IHC 1:100 |
| Chicken polyclonal anti-Protein gene product 9.5 (PGP9.5)                                        | ThermoFisher Scientific | PA1-10011     | Duodenum IHC 1:300                     |
| Chicken polyclonal anti-Glial fibrillary acidic protein (GFAP)                                   | Millipore               | AB5541        | Duodenum IHC 1:300                     |
| Goat polyclonal anti-Choline acetyltransferase (ChAT)                                            | Millipore               | AB144P        | Brain IHC 1:500                        |
| Rabbit polyclonal anti-Tyrosine hydroxylase (TH)                                                 | Millipore               | AB152         | Brain IHC 1:500                        |
| Chicken polyclonal anti-Green fluorescent protein (GFP)                                          | Aves Labs               | GFP-1010      | Brain IHC 1:1000                       |
| Rabbit polyclonal anti-Red fluorescent protein (RFP)                                             | Rockland                | 600-401-379   | Brain IHC 1:1000                       |
| Rabbit polyclonal anti-GBA1                                                                      | Abcam                   | ab175869      | Western 1:1000                         |
| Rabbit polyclonal anti-Interleukin 6 (IL6)                                                       | Abcam                   | ab7737        | Western 1:500                          |
| Rabbit polyclonal anti-Iba1                                                                      | Wako                    | 016-20001     | Western 1:1000                         |
| Rabbit polyclonal anti- $\beta$ -Tubulin                                                         | Abcam                   | ab6046        | Western 1:1000                         |
| Mouse IgG2b anti- $\beta$ -actin                                                                 | Cell Signaling          | 3700          | Western 1:1000                         |
| <b>Secondary Antibodies</b>                                                                      |                         |               |                                        |
| AlexaFluor 488 Goat anti-Mouse IgG2a                                                             | ThermoFisher Scientific | A-21131       | IHC 1:300-1000                         |
| AlexaFluor 488 Donkey anti-Mouse IgG                                                             | ThermoFisher Scientific | A-21202       | IHC 1:300-1000                         |
| AlexaFluor 488 Donkey anti-Chicken IgY                                                           | Jackson ImmunoResearch  | 703-545-155   | IHC 1:300-1000                         |
| AlexaFluor 555 Donkey anti-Rabbit IgG                                                            | ThermoFisher Scientific | A-31572       | IHC 1:300-1000                         |
| AlexaFluor 555 Donkey anti-Goat IgG                                                              | ThermoFisher Scientific | A-21432       | IHC 1:300-1000                         |
| AlexaFluor 633 Goat anti-Rabbit IgG                                                              | ThermoFisher Scientific | A-21071       | IHC 1:300-1000                         |
| AlexaFluor 633 Goat anti-Chicken IgY                                                             | ThermoFisher Scientific | A-21103       | IHC 1:300-1000                         |
| Horseradish peroxidase (HRP)-linked Goat anti-Rabbit IgG                                         | CellSignaling           | 7074          | Western, dot blot 1:2000               |
| Horseradish peroxidase (HRP)-linked Goat anti-Mouse IgG                                          | CellSignaling           | 7076          | Western 1:2000                         |
| Horseradish peroxidase (HRP)-linked Goat anti-Mouse IgG2a                                        | Abcam                   | ab97245       | Western 1:2000                         |

## Supplementary Table 2. Statistics and quantification

### Main figures

| Figure | Number of subjects                                                                       | Test                            | Summary                                                                                                                                                                                                                                                                                                | Key comparisons                                                                                                                                                                                                                  |
|--------|------------------------------------------------------------------------------------------|---------------------------------|--------------------------------------------------------------------------------------------------------------------------------------------------------------------------------------------------------------------------------------------------------------------------------------------------------|----------------------------------------------------------------------------------------------------------------------------------------------------------------------------------------------------------------------------------|
| 1b     | For 0, 7, 21, 60, 120 dpi:<br>α-Syn mon = 9, 9, 9, 8, 8<br>α-Syn PFF = 16, 14, 14, 11, 8 | Two-way ANOVA                   | <u>Condition x Time:</u><br>$F(4,96) = 1.857$ ; $P = 0.1243$<br><u>Time factor:</u><br>$F(4,96) = 4.490$ ; $P = 0.0023$<br><u>Condition factor:</u><br>$F(1,96) = 22.72$ ; $P < 0.0001$                                                                                                                | PFF: 0 dpi vs. 21 dpi, ** $p = 0.00$<br>PFF: 0 dpi vs. 60 dpi, ** $p = 0.0027$<br>60 dpi: α-Syn PFF vs. α-Syn mon, * $p = 0.0187$                                                                                                |
| 1c     |                                                                                          | Two-way ANOVA                   | <u>Condition x Time:</u><br>$F(4,96) = 3.980$ ; $P = 0.0050$<br><u>Time factor:</u><br>$F(4,96) = 1.808$ ; $P = 0.1136$<br><u>Condition factor:</u><br>$F(1,96) = 6.438$ ; $P = 0.0128$                                                                                                                | PFF: 0 dpi vs. 120 dpi, $p = 0.0745$<br>60 dpi: α-Syn PFF vs. α-Syn mon, * $p = 0.0259$                                                                                                                                          |
| 1d     | For 0, 7, 21, 60, 120 dpi:<br>α-Syn mon = 6, 7, 6, 6, 6<br>α-Syn PFF = 7, 8, 9, 9, 8     | Two-way ANOVA                   | <u>Condition x Time:</u><br>$F(4,62) = 5.264$ ; $P = 0.0010$<br><u>Time factor:</u><br>$F(4,62) = 3.042$ ; $P = 0.0235$<br><u>Condition factor:</u><br>$F(1,62) = 14.47$ ; $P = 0.0003$                                                                                                                | PFF: 0 dpi vs. 120 dpi, ** $p = 0.0042$<br>60 dpi: α-Syn PFF vs. α-Syn mon, ** $p = 0.0012$<br>120 dpi: α-Syn PFF vs. α-Syn mon, * $p = 0.0239$                                                                                  |
| 1e     | α-Syn mon = 4<br>α-Syn PFF = 4                                                           | Student's t-test,<br>one-tailed | Fractalkine: $t = 6.976$ , $df = 3$<br>IL-1a: $t = 5.172$ , $df = 3$<br>IL-6: $t = 2.562$ , $df = 3$<br>IL-7: $t = 2.606$ , $df = 3$<br>MCP-1: $t = 2.564$ , $df = 3$<br>MCSF: $t = 2.430$ , $df = 3$<br>MIG: $t = 2.572$ , $df = 3$<br>TECK: $t = 2.711$ , $df = 3$<br>TIMP-2: $t = 2.608$ , $df = 3$ | Fractalkine, ** $p = 0.0030$<br>IL-1a, ** $p = 0.0070$<br>IL-6, * $p = 0.0415$<br>IL-7, * $p = 0.0400$<br>MCP-1, * $p = 0.0416$<br>MCSF, * $p = 0.0467$<br>MIG, * $p = 0.0412$<br>TECK, * $p = 0.0365$<br>TIMP-2, * $p = 0.0400$ |
| 1f     | All conditions = 4                                                                       | One-way ANOVA                   | $F(7,24) = 29.13$ , $P < 0.0001$                                                                                                                                                                                                                                                                       | WT vs. PFF 21 dpi, * $p = 0.0366$<br>WT vs. PFF 60 dpi, **** $p < 0.0001$<br>WT vs. PFF 120 dpi, * $p = 0.0245$<br>WT vs. ASO, **** $p < 0.0001$<br>PFF 60 dpi vs. mon. 60 dpi, *** $p = 0.0001$                                 |
| 1h     | WT = 6<br>ASO = 6<br>For 7, 21, 60, 120 dpi:<br>α-Syn PFF = 6, 6, 5, 5                   | One-way ANOVA                   | $F(8,45) = 1.519$ , $P = 0.1776$                                                                                                                                                                                                                                                                       | WT vs. PFF 7dpi, * $p = 0.0425$                                                                                                                                                                                                  |
| 1i     | For 7, 60 dpi:<br>α-Syn mon = 5, 5                                                       | One-way ANOVA                   | $F(8,45) = 2.501$ , $P = 0.0269$                                                                                                                                                                                                                                                                       | WT vs. PFF 60 dpi, * $p = 0.0329$<br>WT vs. PFF 120 dpi, * $p = 0.0232$                                                                                                                                                          |

|    |                                                                                                                                             |                                 |                                                                                                                                                                                 |                                                                                                                                                        |
|----|---------------------------------------------------------------------------------------------------------------------------------------------|---------------------------------|---------------------------------------------------------------------------------------------------------------------------------------------------------------------------------|--------------------------------------------------------------------------------------------------------------------------------------------------------|
| 1k | All conditions = 4                                                                                                                          | One-way ANOVA                   | F(8,27) = 6.622, P < 0.0001                                                                                                                                                     | WT vs. PFF 21 dpi, ** p = 0.0039<br>WT vs. PFF 60 dpi, * p = 0.0149<br>WT vs. PFF 120 dpi, * p = 0.0467<br>WT vs. ASO, * p = 0.0182                    |
| 2b | All conditions = 4                                                                                                                          | One-way ANOVA                   | F(8,27) = 3.230, P = 0.0116                                                                                                                                                     | WT vs. PFF 60 dpi, ** p = 0.0026<br>WT vs. PFF 120 dpi, * p = 0.0155<br>WT vs. ASO, ** p = 0.0032                                                      |
| 2d | All conditions = 4<br>Except:<br>WT = 6, ASO = 5                                                                                            | One-way ANOVA                   | F(8, 30) = 4.993, P = 0.0005                                                                                                                                                    | WT vs. PFF 60 dpi, ** p = 0.0042<br>WT vs. ASO, ** p = 0.0057                                                                                          |
| 2e | WT = 11<br>ASO = 6<br><u>For 7, 21, 60, 120 dpi:</u><br>$\alpha$ -Syn PFF = 6, 5, 4, 4<br><u>For 7, 60 dpi:</u><br>$\alpha$ -Syn mon = 4, 4 | One-way ANOVA                   | F(8,40) = 4.697, P = 0.0004                                                                                                                                                     | WT vs. PFF 7dpi, * p = 0.0202<br>PFF 7 dpi vs. PFF 120 dpi, * p = 0.0415<br>WT vs. ASO, ** p = 0.0035<br>ASO vs. PFF 120 dpi, * p = 0.0109             |
| 2i | All conditions = 5                                                                                                                          | Two-way ANOVA                   | <u>Genotype x Treatment</u><br>F(1,16) = 1.272; P = 0.2761<br><u>Genotype factor:</u><br>F(1,16) = 10.63; P = 0.0049<br><u>Treatment factor:</u><br>F(1,16) = 66.58; P < 0.0001 | WT/GFP vs. WT/GBA1, **** p < 0.0001<br>WT/GFP vs. ASO/GBA1, * p = 0.0192<br>ASO/GFP vs. ASO/GBA1, *** p = 0.0008<br>WT/GBA1 vs. ASO/GBA1, * p = 0.0410 |
| 2j | All conditions = 5                                                                                                                          | Two-way ANOVA                   | <u>Genotype x Treatment</u><br>F(1,16) = 3.685; P = 0.0729<br><u>Genotype factor:</u><br>F(1,16) = 49.90; P < 0.0001<br><u>Treatment factor:</u><br>F(1,16) = 3.801; P = 0.0690 | WT/GFP vs. ASO/GFP, **** p < 0.0001<br>WT/GFP vs. ASO/GBA1, * p = 0.0139<br>ASO/GFP vs. ASO/GBA1, p = 0.0879                                           |
| 2k | <u>For 0, 7, 21, 60 dpi:</u><br>WT = 17, 12, 11, 8<br>ASO = 13, 12, 11, 10                                                                  | Fecal pellets:<br>Two-way ANOVA | <u>Genotype x Time</u><br>F(3,86) = 1.160; P = 0.3296<br><u>Genotype factor:</u><br>F(1,86) = 13.80; P = 0.0004<br><u>Time factor:</u><br>F(3,86) = 2.084; P = 0.1082           | 0 dpi: WT vs. ASO, ** p = 0.0078                                                                                                                       |
|    |                                                                                                                                             | Pellet weight:<br>Two-way ANOVA | <u>Genotype x Time</u><br>F(3,85) = 1.612; P = 0.1926<br><u>Genotype factor:</u><br>F(1,85) = 14.14; P = 0.0004<br><u>Time factor:</u><br>F(3,85) = 2.084; P = 0.1082           | 0 dpi: WT vs. ASO, ** p = 0.0061                                                                                                                       |

|              |                                                                                                                                   |                                           |                                                                                                                                                                                                      |                                                                                                                                                     |
|--------------|-----------------------------------------------------------------------------------------------------------------------------------|-------------------------------------------|------------------------------------------------------------------------------------------------------------------------------------------------------------------------------------------------------|-----------------------------------------------------------------------------------------------------------------------------------------------------|
| 2k           | For 0, 7, 21, 60 dpi:<br>WT = 17, 12, 11, 8<br>ASO = 13, 12, 11, 10                                                               | Proportion water weight:<br>Two-way ANOVA | <u>Genotype x Time</u><br>F(3,85) = 6.410; P = 0.0006<br><u>Genotype factor:</u><br>F(1,85) = 54.34; P < 0.0001<br><u>Time factor:</u><br>F(3,85) = 0.6193; P = 0.6044                               | 0 dpi: WT vs. ASO, **** p < 0.0001<br>7 dpi: WT vs. ASO, *** p = 0.0003<br>ASO: 0 dpi vs. 60 dpi, * p = 0.0265                                      |
|              |                                                                                                                                   | Whole gut transit time:<br>Two-way ANOVA  | <u>Genotype x Time</u><br>F(3,86) = 0.7794; P = 0.5087<br><u>Genotype factor:</u><br>F(1, 86) = 19.15; P < 0.0001<br><u>Time factor:</u><br>F(3,86) = 0.4554; P = 0.7142                             | 0 dpi: WT vs. ASO, * p = 0.0123                                                                                                                     |
| 3i<br>jR+    | Baseline = 2(63)<br>WT = 3(183)<br>PFF 7 dpi = 4(355)<br>PFF 60 dpi = 3(110)<br>Mon 7 dpi = 3(110)<br>Mon 60 dpi = 3(90)          | One-way ANOVA                             | Peak ΔF/F<br>F(5, 949) = 60.52; P < 0.0001                                                                                                                                                           | WT, stim vs. no stim, **** p < 0.0001<br>WT vs. PFF 7 dpi, **** p < 0.0001<br>WT vs. PFF 60 dpi, **** p < 0.0001                                    |
|              |                                                                                                                                   |                                           | Area under the curve<br>F(5,932) = 55.90; P < 0.0001                                                                                                                                                 | WT, stim vs. no stim, **** p < 0.0001<br>WT vs. PFF 7 dpi, **** p < 0.0001<br>WT vs. PFF 60 dpi, **** p < 0.0001                                    |
| 3i<br>jR/ChR | Baseline = 2(12)<br>WT = 3(28)<br>PFF 7 dpi = 4(55)<br>PFF 60 dpi = 3(40)<br>Mon 7 dpi = 3(23)<br>Mon 60 dpi = 3(15)              | One-way ANOVA                             | Peak ΔF/F<br>F(5, 157) = 23.49; P < 0.0001                                                                                                                                                           | WT, stim vs. no stim, **** p < 0.0001<br>WT vs. PFF 7 dpi, **** p < 0.0001<br>WT vs. PFF 60 dpi, **** p < 0.0001                                    |
|              |                                                                                                                                   |                                           | Area under the curve<br>F(5,167) = 8.613; P < 0.0001                                                                                                                                                 | WT, stim vs. no stim, **** p < 0.001<br>WT vs. PFF 7 dpi, * p = 0.0488<br>WT vs. PFF 60 dpi, * p = 0.0214                                           |
| 3j<br>jR+    | WT 0 dpvi = 3(131)<br>WT 7 dpvi = 3(78)<br>WT 60 dpvi = 3(131)<br>ASO 0 dpvi = 3(78)<br>ASO 7 dpvi = 3(80)<br>ASO 60 dpvi = 3(71) | Two-way ANOVA                             | <u>Peak ΔF/F</u><br><u>Genotype x Time</u><br>F(2,563) = 10.01; P < 0.0001<br><u>Genotype factor</u><br>F(1, 563) = 68.91<br><u>Time factor</u><br>F(2,563) = 3.847; P = 0.0219                      | WT vs. ASO, **** p < 0.0001<br>WT vs. ASO 60 dpvi, * p = 0.0296<br>ASO vs. ASO 60 dpvi, *** p = 0.0007<br>ASO 7 dpvi vs. ASO 60 dpvi, ** p = 0.0068 |
|              |                                                                                                                                   |                                           | <u>Area under the curve</u><br><u>Genotype x Time</u><br>F(2,72) = 1.407; P = 0.2516<br><u>Genotype factor</u><br>F(1,72) = 48.71; P < 0.0001<br><u>Time factor</u><br>F(2, 72) = 0.8416; P = 0.4352 | WT vs. ASO, **** p < 0.0001<br>WT vs. ASO 60 dpvi, *** p = 0.0006<br>WT 7 dpvi vs. ASO 7 dpvi, ** p = 0.0031<br>ASO vs. ASO 60 dpvi, p = 0.0808     |

|              |                                                                                                                                   |               |                                                                                                                                                                                                                     |                                                                               |
|--------------|-----------------------------------------------------------------------------------------------------------------------------------|---------------|---------------------------------------------------------------------------------------------------------------------------------------------------------------------------------------------------------------------|-------------------------------------------------------------------------------|
| 3j<br>jR/ChR | WT 0 dpvi = 3(131)<br>WT 7 dpvi = 3(78)<br>WT 60 dpvi = 3(131)<br>ASO 0 dpvi = 3(78)<br>ASO 7 dpvi = 3(80)<br>ASO 60 dpvi = 3(71) | Two-way ANOVA | <u>Peak <math>\Delta F/F</math></u><br><u>Genotype x Time</u><br>F (2, 490) = 7.103; P = 0.0009<br><u>Genotype factor</u><br>F (1, 490) = 61.42; P < 0.0001<br><u>Time factor</u><br>F (2, 490) = 1.595; P = 0.2040 | 0 dpi: WT vs. ASO, **** p < 0.0001<br>7 dpi: WT vs. ASO, *** p = 0.0006       |
|              |                                                                                                                                   |               | <u>Area under the curve</u><br><u>Genotype x Time</u><br>F (2, 72) = 1.586; P = 0.2117<br><u>Genotype factor</u><br>F (1, 72) = 10.55; P = 0.0018<br><u>Time factor</u><br>F (2, 72) = 3.074; P = 0.0523            | WT vs. ASO, * p = 0.0398                                                      |
| 4a           | WT = 11<br>Aged = 5<br>ASO = 6                                                                                                    | One-way ANOVA | F(2,19) = 24.13; P < 0.0001                                                                                                                                                                                         | WT vs Aged, ** p = 0.0022<br>WT vs. ASO, **** p < 0.0001                      |
| 4b           | WT = 6<br>Aged = 4<br>ASO = 5                                                                                                     | One-way ANOVA | F(2,12) = 14.09; P = 0.0007                                                                                                                                                                                         | WT vs. ASO, *** p = 0.0006<br>Aged vs. ASO, * p = 0.0202                      |
| 4c           | WT = 4<br>Aged = 4<br>ASO = 6                                                                                                     | One-way ANOVA | F(2,11) = 4.298; P = 0.0418                                                                                                                                                                                         | WT vs. ASO, * p = 0.0468                                                      |
| 4d           | <u>For 0, 60, 120 dpi:</u><br>$\alpha$ -Syn mon. = 9, 6, 4<br>$\alpha$ -Syn PFF. = 10, 7, 6                                       | Two-way ANOVA | <u>Treatment x Time</u><br>F(2,36) = 2.635; P = 0.0855<br><u>Time factor</u><br>F(2,36) = 9.165; P = 0.0006<br><u>Treatment factor</u><br>F(1,36) = 2.148; P = 0.1514                                               | PFF: 0 dpi vs. 60 dpi, * p = 0.0300<br>PFF: 0 dpi vs. 120 dpi, *** p = 0.0007 |
| 4e           |                                                                                                                                   | Two-way ANOVA | <u>Treatment x Time</u><br>F(2,36) = 3.713; P = 0.0342<br><u>Time factor</u><br>F(2,36) = 2.426; P = 0.1027<br><u>Treatment factor</u><br>F(1,36) = 18.63; P = 0.0001                                               | PFF: 0 dpi vs. 120 dpi, * p = 0.0209<br>120 dpi: mon. vs. PFF, * p = 0.0125   |
| 4f           |                                                                                                                                   | Two-way ANOVA | <u>Treatment x Time</u><br>F(2,29) = 0.9799; P = 0.3874<br><u>Time factor</u><br>F(2,29) = 4.684; P = 0.0173<br><u>Treatment factor</u><br>F(1,29) = 1.089; P = 0.3053                                              | PFF: 0 dpi vs. 120 dpi, * p = 0.0343                                          |

|    |                                                                                                                                       |               |                                                                                                                                                                              |                                                                                                                                                                      |
|----|---------------------------------------------------------------------------------------------------------------------------------------|---------------|------------------------------------------------------------------------------------------------------------------------------------------------------------------------------|----------------------------------------------------------------------------------------------------------------------------------------------------------------------|
| 4g |                                                                                                                                       | Two-way ANOVA | <u>Treatment x Time</u><br>$F(2,36) = 8.681; P = 0.0008$<br><u>Time factor</u><br>$F(2,36) = 4.437; P = 0.0190$<br><u>Treatment factor</u><br>$F(1,36) = 31.53; P < 0.0001$  | PFF: 0 dpi vs. 60 dpi, * $p = 0.0110$<br>PFF: 0 dpi vs. 120 dpi, *** $p = 0.0002$<br>60dpi: mon. vs. PFF, ** $p = 0.0044$<br>120 dpi: mon. vs. PFF, *** $p = 0.0004$ |
| 4h | <u>For 0, 60, 120 dpi:</u><br>$\alpha$ -Syn mon. = 9, 6, 4<br>$\alpha$ -Syn PFF. = 10, 7, 6                                           | Two-way ANOVA | <u>Treatment x Time</u><br>$F(2,36) = 2.229; P = 0.1223$<br><u>Time factor</u><br>$F(2,36) = 2.760; P = 0.0767$<br><u>Treatment factor</u><br>$F(1,36) = 3.591; P = 0.0661$  | PFF: 0 dpi vs. 120 dpi, * $p = 0.0442$                                                                                                                               |
| 4i |                                                                                                                                       | Two-way ANOVA | <u>Treatment x Time</u><br>$F(2,36) = 1.724; P = 0.1927$<br><u>Time factor</u><br>$F(2,36) = 10.32; P = 0.0003$<br><u>Treatment factor</u><br>$F(1,36) = 1.917; P = 0.1747$  | PFF: 0 dpi vs. 120 dpi, *** $p = 0.0006$                                                                                                                             |
| 4l | All conditions = 4                                                                                                                    | Two-way ANOVA | <u>Treatment x Time</u><br>$F(2,18) = 4.220; P = 0.0314$<br><u>Treatment factor</u><br>$F(1,18) = 15.22; P = 0.0005$<br><u>Time factor</u><br>$F(2,18) = 12.10; P = 0.0010$  | PFF: 0 dpi vs 120 dpi, *** $p = 0.0005$<br>120 dpi: PFF vs. mon., * $p = 0.0102$                                                                                     |
| 4m | All conditions = 4                                                                                                                    | Two-way ANOVA | <u>Treatment x Time</u><br>$F(2,18) = 0.7729; P = 0.4764$<br><u>Treatment factor</u><br>$F(1,18) = 10.55; P = 0.0045$<br><u>Time factor</u><br>$F(2,18) = 5.665; P = 0.0124$ | PFF: 0 dpi vs. 120 dpi, $p = 0.0771$<br>Mon 0 dpi vs PFF 120 dpi, ** $p = 0.0049$                                                                                    |
| 4n | For 0, 60, 120 dpi:<br>WT = 4, 4, 4<br>Aged PFF = 5, 5, 6<br>For 60, 120 dpi:<br>Aged mon. = 4, 4<br>ASO young = 4<br>ASO 12 m.o. = 6 | One-way ANOVA | $F(9,36) = 6.176; P < 0.0001$                                                                                                                                                | Aged PFF: 0 dpi vs. 120 dpi, * $p = 0.0487$<br>ASO young vs. ASO 12 m.o., ** $p = 0.0017$                                                                            |

Extended Data Figures

| Figure | Number of subjects                                                                                                                         | Test                            | Summary                                                                                                         | Key comparisons                                                                                                                                           |
|--------|--------------------------------------------------------------------------------------------------------------------------------------------|---------------------------------|-----------------------------------------------------------------------------------------------------------------|-----------------------------------------------------------------------------------------------------------------------------------------------------------|
| e1a    | WT = 42<br>ASO = 20<br>Aged = 19                                                                                                           | One-way ANOVA                   | $F(2,78) = 7.080$ ; $P = 0.0015$                                                                                | WT vs. ASO, ** $p = 0.022$<br>ASO vs. Aged, ** $p = 0.0075$                                                                                               |
| e1b    |                                                                                                                                            | One-way ANOVA                   | $F(2,78) = 25.12$ ; $P < 0.0001$                                                                                | WT vs. ASO, **** $p < 0.0001$<br>WT vs. Aged, *** $p = 0.0009$<br>ASO vs. Aged, **** $p < 0.0001$                                                         |
| e1c    |                                                                                                                                            | One-way ANOVA                   | $F(2,78) = 27.16$ ; $P < 0.0001$                                                                                | WT vs. ASO, **** $p < 0.0001$<br>ASO vs. Aged, **** $p < 0.0001$                                                                                          |
| e1d    | WT = 13<br>ASO = 9<br>Aged = 12                                                                                                            | One-way ANOVA                   | $F(2,31) = 14.69$ ; $P < 0.0001$                                                                                | WT vs. ASO, **** $p < 0.0001$<br>ASO vs. Aged, ** $p = 0.0038$                                                                                            |
| e1e    | WT = 42<br>ASO = 20<br>Aged = 19                                                                                                           | One-way ANOVA                   | $F(2,78) = 116.9$ ; $P < 0.0001$                                                                                | WT vs. Aged, **** $p < 0.0001$<br>ASO vs. Aged, **** $p < 0.0001$                                                                                         |
| e1f    | WT = 3<br>ASO = 4<br>Aged = 4                                                                                                              | One-way ANOVA                   | $F(2, 8) = 2.541$ ; $P = 0.1399$                                                                                |                                                                                                                                                           |
| e1g    | See Fig. 1e                                                                                                                                |                                 |                                                                                                                 |                                                                                                                                                           |
| e1i    | All conditions = 4                                                                                                                         | One-way ANOVA                   | $F(7, 24) = 4.712$ ; $P = 0.0019$                                                                               | WT vs. ASO, * $p = 0.0304$<br>WT vs. PFF 60 dpi, * $p = 0.0327$<br>60 dpi: PFF vs. mon., * $p = 0.0480$                                                   |
| e2d    | WT = 4<br>All PFF = 5<br>Mon. 7 dpi = 4<br>Mon. 60 dpi = 5                                                                                 | One-way ANOVA                   | Neurons per crypt<br>$F(8, 45) = 0.07617$ ; $P = 0.9997$<br>EGCs per crypt<br>$F(8, 39) = 2.501$ ; $P = 0.0269$ | EGCs, WT vs. PFF 60 dpi, * $p = 0.0329$<br>EGCs, WT vs. PFF 120 dpi, * $p = 0.0232$                                                                       |
| e2f    | $\alpha$ -Syn mon. = 4<br>$\alpha$ -Syn PFF. = 5                                                                                           | Student's t-test,<br>one-tailed | $F(4,3) = 58.59$ ; $P = 0.0071$                                                                                 | Mon. vs. PFF, * $p = 0.0071$                                                                                                                              |
| e3b    | WT = 8<br>PFF 7 dpi = 5<br>PFF 21 dpi = 5<br>PFF 60 dpi = 5<br>PFF 120 dpi = 5<br>Mon. 7 dpi = 4<br>Mon. 60 dpi = 4<br>ASO = 8<br>Aged = 5 | One-way ANOVA                   | $F(8, 40) = 5.132$ ; $P = 0.0002$                                                                               | WT vs. ASO, ** $p = 0.0092$                                                                                                                               |
| e3d    | All conditions = 3<br>except BSA, 50 = 4                                                                                                   | One-way ANOVA                   | $F(4, 11) = 7.188$ ; $P = 0.0042$                                                                               | BSA vs. PFF, 50, ** $p = 0.0080$<br>BSA vs. PFF, 100, *** $p = 0.0009$<br>Mon., 50 vs. PFF, 50, * $p = 0.0178$<br>Mon., 100 vs. PFF, 100, ** $p = 0.0078$ |

|     |                                                                                                                                  |               |                                                                                                                                                                                   |                                                                                                                                   |
|-----|----------------------------------------------------------------------------------------------------------------------------------|---------------|-----------------------------------------------------------------------------------------------------------------------------------------------------------------------------------|-----------------------------------------------------------------------------------------------------------------------------------|
| e4a | See Fig. 2k                                                                                                                      |               |                                                                                                                                                                                   |                                                                                                                                   |
| e4b |                                                                                                                                  |               |                                                                                                                                                                                   |                                                                                                                                   |
| e4c |                                                                                                                                  |               |                                                                                                                                                                                   |                                                                                                                                   |
| e4d |                                                                                                                                  |               |                                                                                                                                                                                   |                                                                                                                                   |
| e4e | All conditions = 4                                                                                                               | Two-way ANOVA | <u>Treatment x Genotype</u><br>$F(2,18) = 0.8512; P = 0.4434$<br><u>Time factor</u><br>$F(2,18) = 0.4326; P = 0.6554$<br><u>Genotype factor</u><br>$F(1,18) = 12.10; P = 0.0027$  |                                                                                                                                   |
| e4f |                                                                                                                                  | Two-way ANOVA | <u>Treatment x Genotype</u><br>$F(2,18) = 0.08766; P = 0.9165$<br><u>Time factor</u><br>$F(2,18) = 0.8450; P = 0.4459$<br><u>Genotype factor</u><br>$F(1,18) = 6.227; P = 0.0225$ |                                                                                                                                   |
| e4g |                                                                                                                                  | Two-way ANOVA | <u>Treatment x Genotype</u><br>$F(2,18) = 0.5592; P = 0.5813$<br><u>Time factor</u><br>$F(2,18) = 0.5461; P = 0.5885$<br><u>Genotype factor</u><br>$F(1,18) = 9.940; P = 0.0055$  |                                                                                                                                   |
| e4h |                                                                                                                                  | Two-way ANOVA | <u>Treatment x Genotype</u><br>$F(2,18) = 0.1810; P = 0.8359$<br><u>Time factor</u><br>$F(2,18) = 0.4914; P = 0.6198$<br><u>Genotype factor</u><br>$F(1,18) = 41.38; P < 0.0001$  | 0 dpi: WT vs. ASO, ** p = 0.0085<br>60 dpi: WT vs. ASO, * p = 0.0293                                                              |
| e5a | See Fig. 3i                                                                                                                      |               |                                                                                                                                                                                   |                                                                                                                                   |
| e5b | See Fig 3j                                                                                                                       |               |                                                                                                                                                                                   |                                                                                                                                   |
| e6c | WT = 5<br><u>For 7, 60, 120 dpi:</u><br>α-Syn PFF = 5, 5, 4<br><u>For 7, 60 dpi:</u><br>α-Syn mon. = 4, 3<br>ASO = 5<br>Aged = 5 | One-way ANOVA | $F(7,28) = 5.007; P = 0.0009$                                                                                                                                                     | WT vs. ASO, ** p = 0.0011<br>ASO vs. mon. 7 dpi, ** p = 0.0027<br>ASO vs. mon. 60 dpi, * p = 0.0176<br>ASO vs. Aged, * p = 0.0323 |
| e7e | WT = 3<br>α-Syn PFF, 60 dpi = 3<br>ASO = 3                                                                                       | One-way ANOVA | $F(2, 6) = 47.90; P = 0.0002$                                                                                                                                                     | WT vs. ASO, *** p = 0.0003<br>PFF 60 dpi vs. ASO, *** p = 0.0007                                                                  |
| e7f |                                                                                                                                  | One-way ANOVA | $F(2, 6) = 32.76; P = 0.0006$                                                                                                                                                     | WT vs. ASO, ** p = 0.0011<br>PFF 60 dpi vs. ASO, ** p = 0.0014                                                                    |

|     |                                                                                                                   |               |                                                                                                                                                                                   |                                                                                                                                                          |
|-----|-------------------------------------------------------------------------------------------------------------------|---------------|-----------------------------------------------------------------------------------------------------------------------------------------------------------------------------------|----------------------------------------------------------------------------------------------------------------------------------------------------------|
| e8a |                                                                                                                   | Two-way ANOVA | <u>Treatment x time</u><br>$F(10,172) = 2.399; P = 0.0108$<br><u>Time factor</u><br>$F(5, 172) = 2.388; P = 0.0400$<br><u>Treatment factor</u><br>$F(2, 172) = 18.24; P < 0.0001$ | PFF: 0 dpi vs. 60 dpi, ** p = 0.0012<br>90 dpi: PFF vs. mon., * p = 0.0265                                                                               |
| e8b | For 0, 7, 21, 60, 90, 120 dpi:<br>α-Syn PFF = 16,14,14,11,9,8<br>α-Syn mon. = 9,9,9,8,8,8<br>BSA = 17,16,11,9,7,7 | Two-way ANOVA | <u>Treatment x time</u><br>$F(10,172) = 1.215; P = 0.2844$<br><u>Time factor</u><br>$F(5,172) = 8.351; P < 0.0001$<br><u>Treatment factor</u><br>$F(2,172) = 8.086; P = 0.0004$   | PFF: 0 dpi vs. 60 dpi, * p = 0.0306<br>PFF: 0 dpi vs. 120 dpi, * p = 0.0285                                                                              |
| e8c |                                                                                                                   | Two-way ANOVA | <u>Treatment x time</u><br>$F(10,172) = 1.215; P = 0.2844$<br><u>Time factor</u><br>$F(5,172) = 8.351; P < 0.0001$<br><u>Treatment factor</u><br>$F(2,172) = 8.086; P = 0.0004$   | PFF: 0 dpi vs. 90 dpi, ** p = 0.0014<br>PFF: 0 dpi vs. 120 dpi, * p = 0.0285<br>60 dpi: PFF vs. mon., * p = 0.0193<br>90 dpi: PFF vs. mon., * p = 0.0342 |
| e8d | For 0, 7, 21, 60, 90, 120 dpi:<br>α-Syn PFF = 8,8,8,12,8,8<br>α-Syn mon. = 9,9,9,8,8,8<br>BSA = 17,16,11,9,7,7    | Two-way ANOVA | <u>Treatment x time</u><br>$F(10,152) = 0.1109; P = 0.9997$<br><u>Time factor</u><br>$F(5,152) = 10.52; P < 0.0001$<br><u>Treatment factor</u><br>$F(2,152) = 7.809; P = 0.0006$  |                                                                                                                                                          |
| e8e |                                                                                                                   | Two-way ANOVA | <u>Treatment x time</u><br>$F(10,145) = 0.5406; P = 0.8589$<br><u>Time factor</u><br>$F(5,145) = 0.8005; P = 0.5510$<br><u>Treatment factor</u><br>$F(2,145) = 5.321; P = 0.0059$ |                                                                                                                                                          |
| e8f | For 0, 7, 21, 60, 90, 120 dpi:<br>α-Syn PFF = 8,8,10,7,6,6<br>α-Syn mon. = 9,9,9,8,8,8<br>BSA = 17,16,11,9,7,7    | Two-way ANOVA | <u>Treatment x time</u><br>$F(10,145) = 1.352; P = 0.2087$<br><u>Time factor</u><br>$F(5,145) = 1.628; P = 0.1562$<br><u>Treatment factor</u><br>$F(2,145) = 17.66; P < 0.0001$   | 60 dpi: PFF vs. BSA, ** p = 0.0023                                                                                                                       |
| e8g | Aged baseline: 10<br>Aged monomer, 60 dpi: 4<br>Aged PFF, 60 dpi: 6                                               | One-way ANOVA | $F(2,17) = 0.07091$                                                                                                                                                               |                                                                                                                                                          |
| e9d | All conditions = 4                                                                                                | One-way ANOVA | $F(2,9) = 0.1824; P = 0.8362$                                                                                                                                                     |                                                                                                                                                          |
