# Supplementary material
Source: PubMed Central journal article supplement (PMC7065967)

Extended Data Fig 1H

Cytokine panel

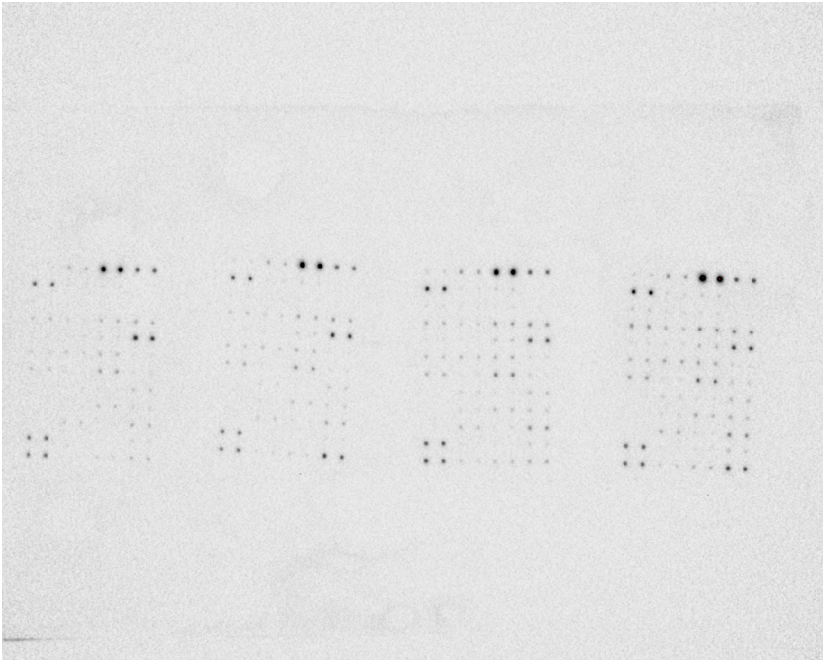

Supplement: NIHMS1548772-supplement-1548772_ED_Fig1_blots_source_data.pdf [file NIHMS1548772-supplement-1548772_ED_Fig1_blots_source_data.pdf]

Fig 1J

Iba1 blot

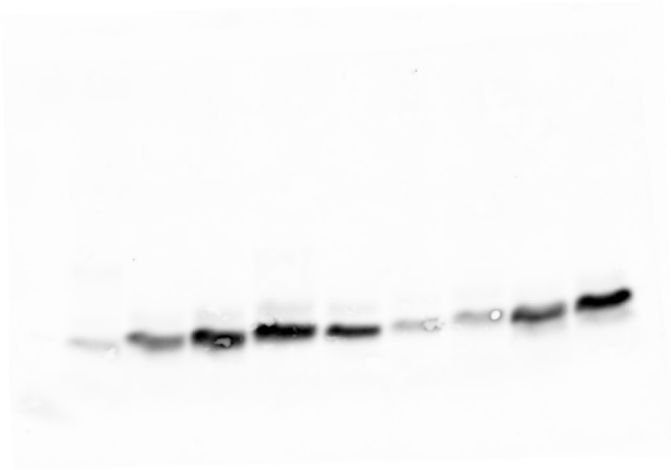

Fig 1J

Beta tubulin blot

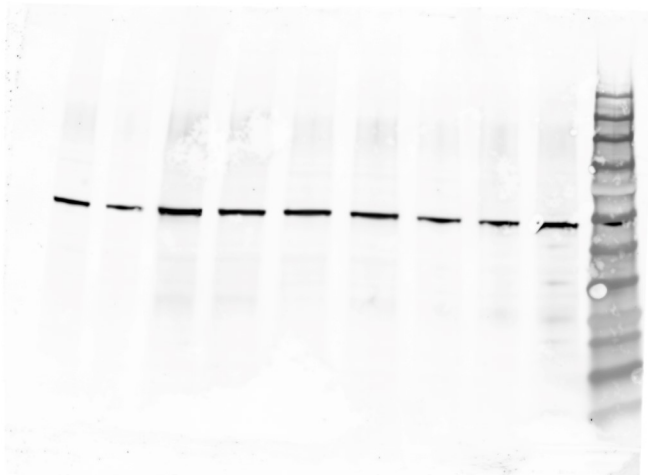

Supplement: NIHMS1548772-supplement-Fig1_blots_source_data.pdf [file NIHMS1548772-supplement-Fig1_blots_source_data.pdf]
